# Supplementary material
Source: Springer Nature journal article supplement (https://www.springermedizin.de/resource/supplementary/12876_2011_644_MOESM1_ESM.pdf/9437156)

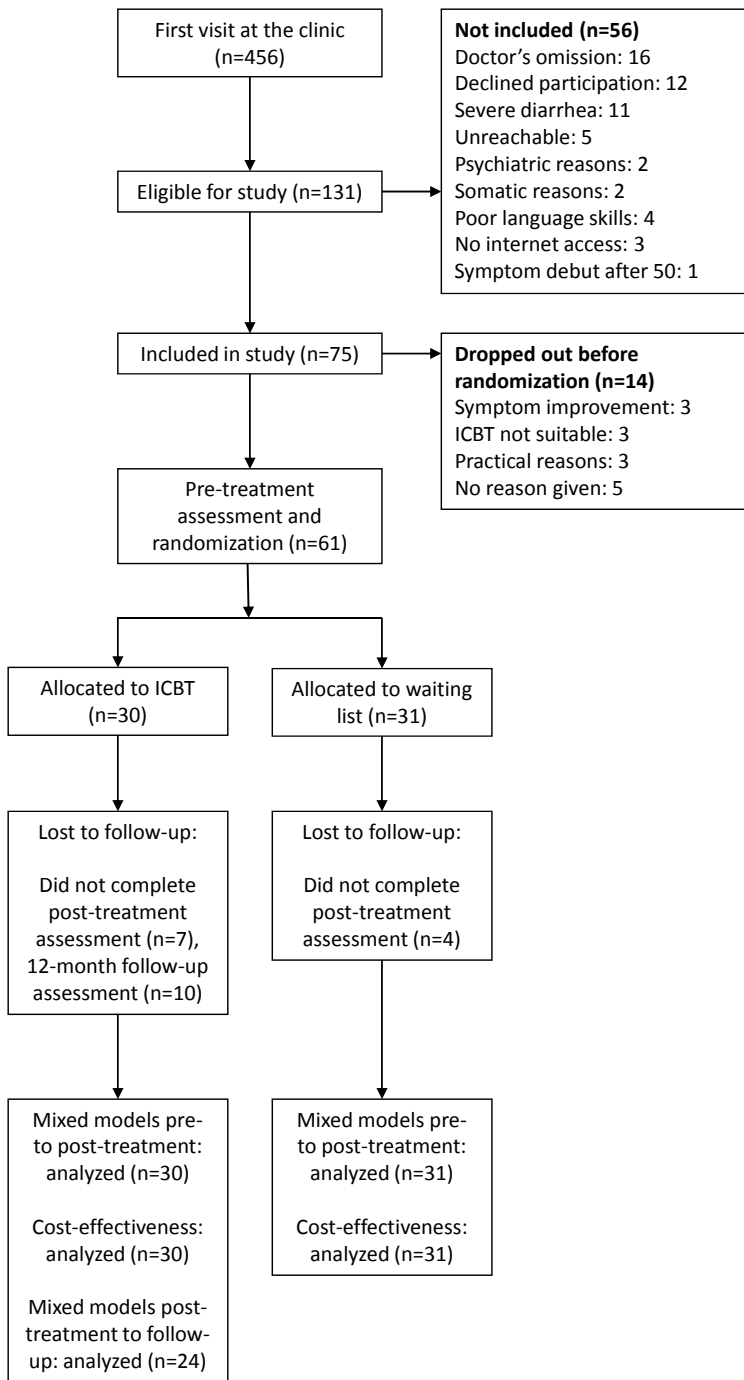

Supplement: MOESM1 [file 9437156]
